# Supplementary material for: PDA-coated CPT@MIL-53(Fe)-based theranostic nanoplatform for pH-responsive and MRI-guided chemotherapy
Source: Royal Society of Chemistry journal article supplement (doi:10.1039/d1tb02339j), 2022-01-01
Supplement: d1tb02339j1.pdf [file d1tb02339j1.pdf]

## PDA-coated CPT@MIL-53 (Fe) based Theranostic Nanoplatform for pH-

### Responsive and MRI-Guided Chemotherapy

Chaohui Zhou, Qingye Yang, Xinyue Zhou, Nengqin Jia\*

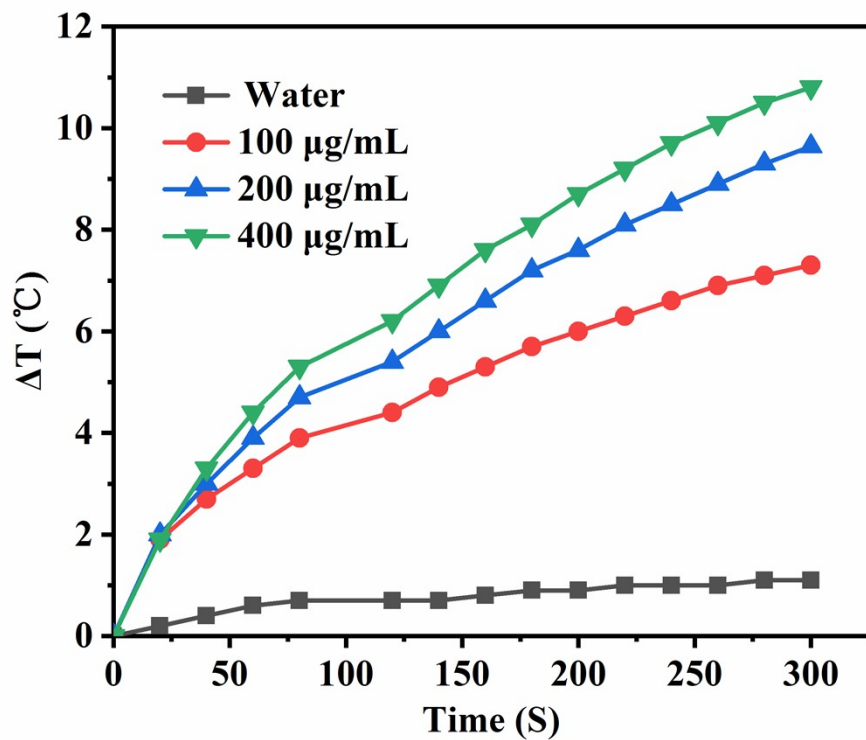

**Figure 1S.** Photothermal heating curves of PDA@CPT@MIL-Fe(53) under 808 nm laser irradiation ( $1.0 \text{ W cm}^{-2}$ )

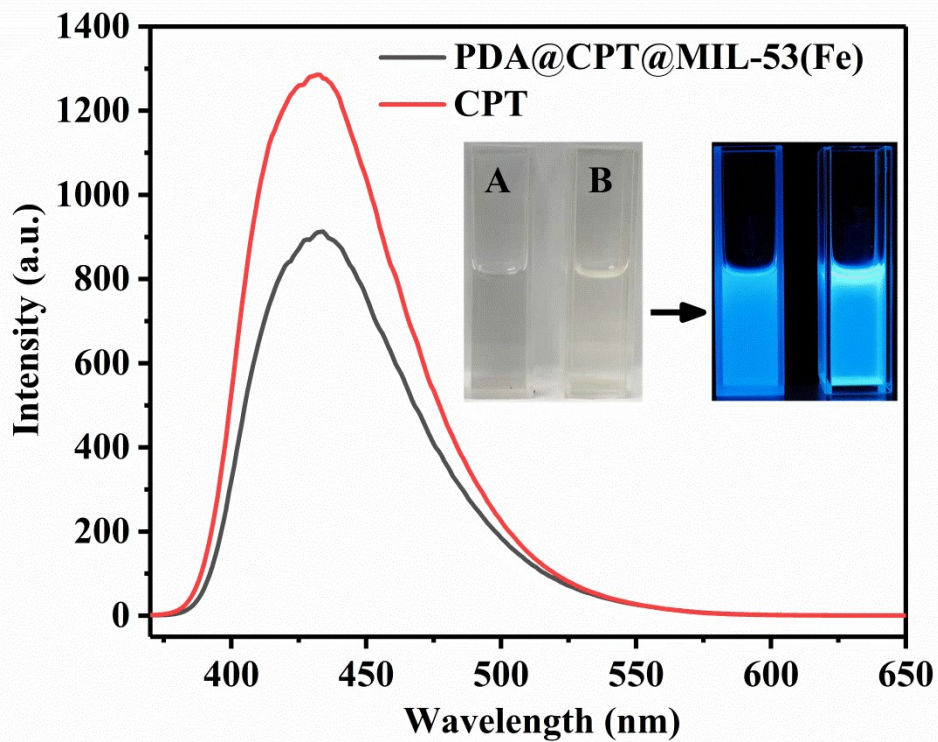

**Figure S2.** PL emission spectra (excitation wavelength = 360 nm) of CPT and PDA@CPT@MIL-53(Fe). Inset shows the graphs of PDA@CPT@MIL-53(Fe) (A) and CPT(B) exposed to daylight (left) and UV light (right)
